# Supplementary material for: Fungal Diversity in Korean Caves and Cave-Inhabiting Bats with Attention to Pseudogymnoascus Species
Source: MDPI journal article supplement (doi:10.3390/d15020198), 2023-02-01
Supplement: s1 [file s1]

**Table S1. Identification of isolated fungi and percentage at phylum, family, and genus level.**

| Phylum               | Isolate<br>s% | Family                      | Isolates<br>% | Genus                      | No.<br>Isolate<br>s | Isolates<br>% |
|----------------------|---------------|-----------------------------|---------------|----------------------------|---------------------|---------------|
| <i>Ascomycota</i>    | 84.4          | <i>Saccharomycetaceae</i>   | 32.5          | <i>Debaryomyces</i>        | 40                  | 26.0          |
|                      |               |                             |               | <i>Candida</i>             | 10                  | 6.5           |
|                      |               | <i>Trichocomaceae</i>       | 22.1          | <i>Penicillium</i>         | 33                  | 21.4          |
|                      |               |                             |               | <i>Aspergillus</i>         | 1                   | 0.6           |
|                      |               | <i>Pseudeurotiaceae</i>     | 15.6          | <i>Pseudogymnoascus</i>    | 20                  | 13.0          |
|                      |               |                             |               | <i>Leuconeurospora</i>     | 4                   | 2.6           |
|                      |               | <i>Cladosporiaceae</i>      | 2.6           | <i>Cladosporium</i>        | 4                   | 2.6           |
|                      |               | <i>Dothioraceae</i>         | 1.9           | <i>Aureobasidium</i>       | 3                   | 1.9           |
|                      |               | <i>Clavicipitaceae</i>      | 1.3           | <i>Metapochonia</i>        | 1                   | 0.6           |
|                      |               |                             |               | <i>Pochonia</i>            | 1                   | 0.6           |
|                      |               | <i>Nectriaceae</i>          | 1.3           | <i>Dialonectria</i>        | 1                   | 0.6           |
|                      |               |                             |               | <i>Fusarium</i>            | 1                   | 0.6           |
|                      |               | <i>Chaetomiaceae</i>        | 0.6           | <i>Chaetomium</i>          | 1                   | 0.6           |
|                      |               | <i>Didymellaceae</i>        | 0.6           | <i>Epicoccum</i>           | 1                   | 0.6           |
|                      |               | <i>Hypocreaceae</i>         | 0.6           | <i>Trichoderma</i>         | 1                   | 0.6           |
|                      |               | <i>Incertae sedis</i>       | 0.6           | <i>Sarocladium</i>         | 1                   | 0.6           |
|                      |               | <i>Microascaceae</i>        | 0.6           | <i>Doratomyces</i>         | 1                   | 0.6           |
|                      |               | <i>Myxotrichaceae</i>       | 0.6           | <i>Oidiodendron</i>        | 1                   | 0.6           |
|                      |               | <i>Plectosphaerellaceae</i> | 0.6           | <i>Verticillium</i>        | 1                   | 0.6           |
|                      |               | <i>Pleosporaceae</i>        | 0.6           | <i>Alternaria</i>          | 1                   | 0.6           |
|                      |               | <i>Sordariomycetes</i>      | 0.6           | <i>Coniochaeta</i>         | 1                   | 0.6           |
|                      |               | <i>Torulaceae</i>           | 0.6           | <i>Torula</i>              | 1                   | 0.6           |
| <i>Basidiomycota</i> | 13.8          | <i>Trichosporonaceae</i>    | 7.1           | <i>Apiotrichum</i>         | 8                   | 5.2           |
|                      |               |                             |               | <i>Pascua</i>              | 2                   | 1.3           |
|                      |               |                             |               | <i>Cutaneotrichosporon</i> | 1                   | 0.6           |
|                      |               | <i>Mrakiaceae</i>           | 6.5           | <i>Tausonia</i>            | 9                   | 5.8           |
|                      |               |                             |               | <i>Apiotrichum</i>         | 1                   | 0.6           |
| <i>Mucoromycota</i>  | 1.9           | <i>Tremellaceae</i>         | 0.6           | <i>Papiliotrema</i>        | 1                   | 0.6           |
|                      |               | <i>Mucoraceae</i>           | 1.9           | <i>Mucor</i>               | 3                   | 1.9           |

**Table S2.** Primer information and PCR protocols used in this study

| Molecular marker <sup>a</sup> | Primer name                 | Primer sequence (5'-3')       | PCR protocol                                                                                                                                                                  |
|-------------------------------|-----------------------------|-------------------------------|-------------------------------------------------------------------------------------------------------------------------------------------------------------------------------|
| ITS                           | ITS1 [1]                    | TCCGTAGGTGAACCTGCG            | 1. 94 °C, 5 min<br>2. 94 °C, 1 min<br>3. 52 °C, 1 min<br>4. 72 °C, 1 min<br>5. Repeat 2-4 for 37 cycles<br>6. 72 °C, 10 min<br>[2]                                            |
|                               | ITS4 [1]                    | TCCTCCGCTTATTGATATG<br>C      |                                                                                                                                                                               |
| LSU                           | LR0R [3]                    | ACCCGCTGAACTTAAGC             | 1. 95 °C, 3 min<br>2. 95 °C, 30 sec<br>3. 54 °C, 30 sec<br>4. 72 °C, 1 min 20 sec<br>5. Repeat 2-4 for 38 cycles<br>6. 72 °C, 5 min<br>[5]                                    |
|                               | LR7 [4]                     | TACTACCACCAAGATCT             |                                                                                                                                                                               |
| Tef1- $\alpha$                | EF1-983 F [6]               | GCYCCYGGHCAYCGTGAY<br>TTYAT   | 1. 94 °C, 2 min<br>2. 66 °C-56 °C<br>touchdown (9 cycles)<br>3. 94 °C, 30 sec<br>4. 56 °C, 1 min<br>5. 72 °C, 1 min<br>6. Repeat 3-5 for 36 cycles<br>6. 72 °C, 10 min<br>[6] |
|                               | EF1-2218 R [6]              | ATGACACCACRACRGCACR<br>GTYTG  |                                                                                                                                                                               |
| MCM7                          | MCM7-709 for [7]            | ACIMGIGTITCVGAYGTHA<br>ARCC   | 1. 94 °C, 5 min<br>2. 94 °C, 45 sec<br>3. 56 °C, 50 sec<br>4. 72 °C, 1 min<br>5. Repeat 2-4 for 38 cycles<br>6. 72 °C, 5 min<br>[7,8]                                         |
|                               | MCM7-1348 rev [7]           | GAYTTDGCACICCCIGRTC<br>WCCCAT |                                                                                                                                                                               |
| RPB2                          | fRPB2-7 cF [9]              | ATGGGYAARCAAGCYATG<br>GG      | 1. 94 °C, 3 min<br>2. 94 °C, 20 sec<br>3. 55 °C, 30 sec<br>4. 72 °C, 1 min<br>5. Repeat 2-4 for 38 cycles<br>6. 72 °C, 10 min<br>[9]                                          |
|                               | RPB2-3053 bR [10]           | TGRATYTTRTCRTCSACCA<br>T      |                                                                                                                                                                               |
| <i>Pd</i> -specific primer    | nu-SSI(1506)-184-5'-Gd [11] | GGGGACGTCCTAAAGCCT            | 1. 98 °C, 2 min<br>2. 98 °C, 10 sec<br>3. 50 °C, 30 sec<br>4. 72 °C, 1 min<br>5. Repeat 2-4 for 40 cycles<br>6. 72 °C, 7 min<br>[11]                                          |
|                               | nu-5.8S-144-3'-Gd [11]      | TTGTAATGACGCTCGGAC            |                                                                                                                                                                               |

<sup>a</sup>ITS: ribosomal internal transcribed spacer, LSU: 28S large subunit rRNA gene, Tef1- $\alpha$ : translation elongation factor 1 alpha, MCM7: minichromosomal maintenance protein 7, RPB2: RNA polymerase II second largest subunit, *Pd*-specific primer: *Pseudogymnoascus destructans* diagnose specific primers

**Table S3.** GenBank accession numbers of the sequences used in this study. Sequences highlighted in bold were generated in this study [12-15].

| No | Species                             | Strain <sup>a</sup>          | Locality           | Substrate /host         | Accession No. |          |                 |          |          |
|----|-------------------------------------|------------------------------|--------------------|-------------------------|---------------|----------|-----------------|----------|----------|
|    |                                     |                              |                    |                         | ITS           | LSU      | MCM7            | RPB2     | TEF1     |
| 1  | <i>Pseudogymnoascus destructans</i> | 20631-21                     | New York, USA      | <i>Myotis lucifugus</i> | EU884921      | KF017865 | KF017691        | KF017747 | KF017806 |
| 2  | <i>Geomyces auratus</i>             | CBS 108.14                   | Norway             | Soil, filter paper bait | KF039895      | KF017864 | KF017690        | KF017746 | KF017805 |
| 3  | <i>Geomyces</i> sp.                 | 23WI05                       | Wisconsin, USA     | Hibernacula soil        | JX270595      | KF017857 | KF017683        | KF017740 | KF017798 |
| 4  | <i>Pseudeurotium zonatum</i>        | CBS 329.36/<br>AFTOL-ID 1912 | France             | Soil near gas leakage   | AY129286      | DQ470988 | na <sup>b</sup> | DQ470940 | DQ471112 |
| 5  | <i>Pseudogymnoascus</i> sp.         | 01NH08                       | New Hampshire, USA | Hibernacula soil        | JX270343      | KF017816 | KF017647        | KF017701 | KF017756 |
| 6  | <i>Pseudogymnoascus</i> sp.         | 02NH05                       | New Hampshire, USA | Hibernacula soil        | JX270350      | KF017818 | KF017649        | KF017703 | KF017758 |
| 7  | <i>Pseudogymnoascus</i> sp.         | 02NH11                       | New Hampshire, USA | Hibernacula soil        | JX270356      | KF017819 | KF017650        | KF017704 | KF017759 |
| 8  | <i>Pseudogymnoascus</i> sp.         | 03VT05                       | Vermont, USA       | Hibernacula soil        | KF039892      | KF017820 | KF017651        | KF017705 | KF017760 |
| 9  | <i>Pseudogymnoascus</i> sp.         | 04NY11                       | New York, USA      | Hibernacula soil        | JX270375      | KF017821 | KF017652        | KF017706 | KF017761 |
| 10 | <i>Pseudogymnoascus</i> sp.         | 04NY16                       | New York, USA      | Hibernacula soil        | JX270377      | KF017822 | KF017653        | KF017707 | KF017762 |
| 11 | <i>Pseudogymnoascus</i> sp.         | 04NY17A                      | New York, USA      | Hibernacula soil        | JX270378      | KF017823 | KF017654        | KF017708 | KF017763 |
| 12 | <i>Pseudogymnoascus</i> sp.         | 05NY06                       | New York, USA      | Hibernacula soil        | JX270385      | KF017824 | KF017655        | KF017709 | KF017764 |
| 13 | <i>Pseudogymnoascus</i> sp.         | 05NY08                       | New York, USA      | Hibernacula soil        | JX270387      | KF017825 | KF017656        | KF017710 | KF017765 |
| 14 | <i>Pseudogymnoascus</i> sp.         | 05NY09                       | New York, USA      | Hibernacula soil        | JX270388      | KF017826 | KF017657        | KF017711 | KF017766 |
| 15 | <i>Pseudogymnoascus</i> sp.         | 07MA02                       | Massachusetts, USA | Hibernacula soil        | JX270402      | KF017827 | KF017658        | KF017712 | KF017767 |
| 16 | <i>Pseudogymnoascus</i> sp.         | 10NY08                       | New York, USA      | Hibernacula soil        | JX270432      | KF017829 | KF017659        | KF017714 | KF017769 |
| 17 | <i>Pseudogymnoascus</i> sp.         | 10NY09                       | New York, USA      | Hibernacula soil        | JX270433      | KF017830 | KF017660        | KF017715 | KF017770 |
| 18 | <i>Pseudogymnoascus</i> sp.         | 10NY10                       | New York, USA      | Hibernacula soil        | JX270434      | KF017831 | na              | KF017716 | KF017771 |
| 19 | <i>Pseudogymnoascus</i> sp.         | 11MA03                       | Massachusetts, USA | Hibernacula soil        | JX270438      | KF017832 | KF017661        | KF017717 | KF017772 |
| 20 | <i>Pseudogymnoascus</i> sp.         | 11MA05                       | Massachusetts, USA | Hibernacula soil        | JX270440      | KF017833 | KF017662        | KF017718 | KF017773 |

| No | Species                     | Strain <sup>a</sup> | Locality              | Substrate<br>/host  | Accession No. |          |          |          |          |
|----|-----------------------------|---------------------|-----------------------|---------------------|---------------|----------|----------|----------|----------|
|    |                             |                     |                       |                     | ITS           | LSU      | MCM7     | RPB2     | TEF1     |
| 21 | <i>Pseudogymnoascus</i> sp. | 11MA07              | Massachusetts,<br>USA | Hibernacula<br>soil | JX270442      | KF017834 | KF017663 | KF017719 | KF017774 |
| 22 | <i>Pseudogymnoascus</i> sp. | 11MA08              | Massachusetts,<br>USA | Hibernacula<br>soil | JX270443      | KF017835 | KF017664 | KF017720 | KF017775 |
| 23 | <i>Pseudogymnoascus</i> sp. | 12NJ13              | New Jersey,<br>USA    | Hibernacula<br>soil | JX270459      | KF017838 | KF017667 | KF017722 | KF017778 |
| 24 | <i>Pseudogymnoascus</i> sp. | 14PA06              | Pennsylvania,<br>USA  | Hibernacula<br>soil | JX270469      | KF017839 | KF017668 | KF017723 | KF017779 |
| 25 | <i>Pseudogymnoascus</i> sp. | 15PA10B             | Pennsylvania,<br>USA  | Hibernacula<br>soil | KF039894      | KF017842 | KF017670 | KF017726 | KF017782 |
| 26 | <i>Pseudogymnoascus</i> sp. | 15PA11              | Pennsylvania,<br>USA  | Hibernacula<br>soil | JX270486      | KF017843 | KF017671 | KF017727 | KF017783 |
| 27 | <i>Pseudogymnoascus</i> sp. | 17WV03              | West Virginia,<br>USA | Hibernacula<br>soil | JX270510      | KF017844 | KF017672 | KF017728 | KF017784 |
| 28 | <i>Pseudogymnoascus</i> sp. | 17WV06              | West Virginia,<br>USA | Hibernacula<br>soil | JX270513      | na       | KF017673 | KF017729 | KF017785 |
| 29 | <i>Pseudogymnoascus</i> sp. | 18VA07              | Virginia, USA         | Hibernacula<br>soil | JX270527      | KF017847 | KF017675 | na       | KF017788 |
| 30 | <i>Pseudogymnoascus</i> sp. | 18VA08              | Virginia, USA         | Hibernacula<br>soil | JX270528      | KF017848 | KF017676 | KF017731 | KF017789 |
| 31 | <i>Pseudogymnoascus</i> sp. | 18VA12              | Virginia, USA         | Hibernacula<br>soil | JX270532      | KF017849 | na       | KF017732 | KF017790 |
| 32 | <i>Pseudogymnoascus</i> sp. | 18VA13              | Virginia, USA         | Hibernacula<br>soil | JX270533      | KF017850 | na       | KF017733 | KF017791 |
| 33 | <i>Pseudogymnoascus</i> sp. | 20KY08              | Kentucky, USA         | Hibernacula<br>soil | JX270562      | KF017851 | KF017677 | KF017734 | KF017792 |
| 34 | <i>Pseudogymnoascus</i> sp. | 20KY10              | Kentucky, USA         | Hibernacula<br>soil | JX270563      | KF017852 | KF017678 | KF017735 | KF017793 |
| 35 | <i>Pseudogymnoascus</i> sp. | 20KY12              | Kentucky, USA         | Hibernacula<br>soil | JX270565      | KF017853 | KF017679 | KF017736 | KF017794 |
| 36 | <i>Pseudogymnoascus</i> sp. | 21IN01              | Indiana, USA          | Hibernacula<br>soil | JX270568      | KF017854 | KF017680 | KF017737 | KF017795 |
| 37 | <i>Pseudogymnoascus</i> sp. | 21IN05              | Indiana, USA          | Hibernacula<br>soil | JX270572      | KF017855 | KF017681 | KF017738 | KF017796 |
| 38 | <i>Pseudogymnoascus</i> sp. | 21IN10              | Indiana, USA          | Hibernacula<br>soil | JX270577      | KF017856 | KF017682 | KF017739 | KF017797 |
| 39 | <i>Pseudogymnoascus</i> sp. | 24MN04              | Minnesota, USA        | Hibernacula<br>soil | JX270612      | KF017859 | KF017685 | KF017741 | KF017800 |
| 40 | <i>Pseudogymnoascus</i> sp. | 24MN06              | Minnesota, USA        | Hibernacula<br>soil | JX270614      | KF017860 | KF017686 | KF017742 | KF017801 |
| 41 | <i>Pseudogymnoascus</i> sp. | 24MN13              | Minnesota, USA        | Hibernacula<br>soil | JX270621      | KF017861 | KF017687 | KF017743 | KF017802 |
| 42 | <i>Pseudogymnoascus</i> sp. | 24MN14              | Minnesota, USA        | Hibernacula<br>soil | JX270622      | KF017862 | KF017688 | KF017744 | KF017803 |

| No | Species                              | Strain <sup>a</sup>      | Locality               | Substrate<br>/host               | Accession No.              |                |                  |                  |                  |
|----|--------------------------------------|--------------------------|------------------------|----------------------------------|----------------------------|----------------|------------------|------------------|------------------|
|    |                                      |                          |                        |                                  | ITS                        | LSU            | MCM7             | RPB2             | TEF1             |
| 43 | <i>Pseudogymnoascus</i> sp.          | 24MN18                   | Minnesota, USA         | Hibernacula soil                 | JX270626                   | KF017863       | KF017689         | KF017745         | KF017804         |
| 44 | <i>Pseudogymnoascus</i> sp.          | A07MA10                  | Massachusetts, USA     | Hibernacula soil                 | KF039893                   | KF017828       | na               | KF017713         | KF017768         |
| 45 | <i>Pseudogymnoascus shaanxiensis</i> | GZUIFR HZ5.7             | China                  | Soil                             | MT509366                   | MT509380       | MT534206         | MT534220         | MT534231         |
| 46 | <i>Pseudogymnoascus sinensis</i>     | CGMCC 3.18493 (K278)     | China                  | Soil                             | MT509364                   | MT509378       | MT534204         | MT534218         | MT534229         |
| 47 | <i>Pseudogymnoascus guizhouensis</i> | GZUIFR 376.1             | China                  | Soil                             | MT509369                   | MT509383       | MT534209         | MT534223         | MT534234         |
| 48 | <i>Pseudogymnoascus antarcticus</i>  | CHFC-EA 569 (F09-T2-1)   | Antarctica             | Antarctic marine sponge          | JX845280                   | MN417282       | MN432493         | MN418135         | MN418131         |
| 49 | <i>Pseudogymnoascus australis</i>    | CHFC-EA 567 (F09-T18-3)  | Antarctica             | Antarctic marine sponge          | MN417287                   | MN417284       | MN432491         | MN418137         | MN418133         |
| 50 | <i>Pseudogymnoascus griseus</i>      | CHFC-EA 568 (F09-T18-14) | Antarctica             | Antarctic marine sponge          | MN417288                   | MN417285       | MN432492         | MN418138         | MN418134         |
| 51 | <i>Pseudogymnoascus lanuginosus</i>  | CHFC-EA 570 (F09-T18-27) | Antarctica             | Antarctic marine sponge          | MN417286                   | MN417283       | MN418139         | MN418136         | MN418132         |
| 52 | <i>Pseudogymnoascus turneri</i>      | LHU121                   | Pennsylvania, USA      | Sediment                         | MN542213                   | na             | na               | MN541380         | MN541379         |
| 53 | <i>Pseudogymnoascus lindneri</i>     | LHU158                   | Pennsylvania, USA      | Sediment                         | MN542212                   | na             | na               | MN541384         | MN541383         |
| 54 | <i>Pseudogymnoascus palmeri</i>      | LHU407                   | Pennsylvania, USA      | Cave sediment                    | MT988150                   | na             | na               | MW054468         | MW054467         |
| 55 | <i>Pseudogymnoascus</i> sp.          | VKM F-103                | New York, USA          | Top soil                         | JPKB010015 24 <sup>c</sup> | JPKB01001 524  | JPKB01001 753    | JPKB01001 744    | JPKB01001 786    |
|    |                                      |                          |                        |                                  | (1 to 491)                 | (560 to 1413)  | (13559 to 14177) | (6669 to 7432)   | (12082-12985)    |
| 56 | <i>Pseudogymnoascus</i> sp.          | VKM F-3775               | Germany                | Soil from a wheat field          | JPJT010068 01              | JPJT01006 801  | JPJT010068 17    | JPJT010048 17    | JPJT010005 24    |
|    |                                      |                          |                        |                                  | (2157 to 2734)             | (2803 to 4000) | (1917 to 2535)   | (6048 to 6811)   | (8398 to 9301)   |
| 57 | <i>Pseudogymnoascus</i> sp.          | VKM F-4514               | Kolyma Lowland, Russia | Permafrost soil                  | JPJX010027 11              | JPJX01002 812  | JPJX010009 52    | JPJX010004 86    | JPJX010013 37    |
|    |                                      |                          |                        |                                  | (178 to 755)               | (1 to 973)     | (6565 to 7183)   | (13807 to 14571) | (38563 to 39010) |
| 58 | <i>Pseudogymnoascus</i> sp.          | 22984-1-I1               | Tennessee, USA         | <i>Perimyotis subflavus</i>      | JX415262                   | KF017866       | KF017692         | na               | KF017807         |
| 59 | <i>Pseudogymnoascus</i> sp.          | 23014-1-I6               | Tennessee, USA         | <i>Lasionycteris noctivagans</i> | JX512256                   | KF017867       | KF017693         | KF017748         | KF017808         |
| 60 | <i>Pseudogymnoascus</i> sp.          | 23342-1-I1               | Wisconsin, USA         | <i>Perimyotis subflavus</i>      | JX415266                   | KF017868       | KF017694         | KF017749         | KF017809         |

| No | Species                               | Strain <sup>a</sup> | Locality              | Substrate<br>/host           | Accession No. |          |              |              |              |
|----|---------------------------------------|---------------------|-----------------------|------------------------------|---------------|----------|--------------|--------------|--------------|
|    |                                       |                     |                       |                              | ITS           | LSU      | MCM7         | RPB2         | TEF1         |
| 61 | <i>Pseudogymnoascus</i> sp.           | RMF C 101           | Utah, USA             | Soil from desert grasslands  | KF039896      | KF017869 | KF017695     | KF017750     | KF017810     |
| 62 | <i>Pseudogymnoascus</i> sp.           | RMF 7792            | Wyoming, USA          | Periglacial soil             | KF039898      | KF017871 | KF017697     | KF017752     | KF017812     |
| 63 | <i>Pseudogymnoascus palmeri</i>       | WSF 3629            | Wisconsin, USA        | Amorphous peat               | KF039897      | KF017870 | KF017696     | KF017751     | KF017811     |
| 64 | <i>Pseudogymnoascus pannorum</i>      | ATCC 16222          | West Germany, Germany | Soil from wheat field        | AF015789      | na       | KF686777     | na           | KF686766     |
| 65 | <i>Pseudogymnoascus</i> sp.           | MN-Mycosel-7        | Minnesota, USA        | Hibernacula soil             | KF039899      | KF017872 | KF017698     | KF017753     | KF017813     |
| 66 | <i>Pseudogymnoascus verrucosus</i>    | UAMH 10579          | Alberta, Canada       | brown-rotted wood bait block | NR_111197     | na       | XM_018270150 | XM_018270703 | XM_018277618 |
| 67 | <i>Pseudogymnoascus turneri</i>       | Ps5                 | Pennsylvania, USA     | Sediment                     | MN542214      | na       | na           | MN541382     | MN541381     |
| 68 | <i>Pseudogymnoascus guizhouensis</i>  | GZUIFR 376.2        | China                 | Soil                         | MT509370      | MT509384 | MT534210     | MT534224     | MT534235     |
| 69 | <i>Pseudogymnoascus yunnanensis</i>   | GZUIFR 21.807       | China                 | Soil                         | MZ444072      | MZ444099 | MZ490754     | MZ488537     | MZ488514     |
| 70 | <i>Pseudogymnoascus yunnanensis</i>   | GZUIFR 21.808       | China                 | Soil                         | MZ444073      | MZ444100 | MZ490755     | MZ488538     | MZ488515     |
| 71 | <i>Pseudogymnoascus zhejiangensis</i> | GZUIFR 21.810       | China                 | Soil                         | MZ444075      | MZ444102 | MZ490757     | MZ488540     | MZ488517     |
| 72 | <i>Pseudogymnoascus zhejiangensis</i> | GZUIFR 21.811       | China                 | Soil                         | MZ444076      | MZ444103 | MZ490758     | MZ488541     | MZ488518     |
| 73 | <i>Pseudogymnoascus catenatus</i>     | GZUIFR 21.813       | China                 | Soil                         | MZ444078      | MZ444105 | MZ490760     | MZ488543     | MZ488520     |
| 74 | <i>Pseudogymnoascus catenatus</i>     | GZUIFR 21.814       | China                 | Soil                         | MZ444079      | MZ444106 | MZ490761     | MZ488544     | MZ488521     |
| 75 | <i>Pseudogymnoascus fujianensis</i>   | GZUIFR 21.819       | China                 | Soil                         | MZ444084      | MZ444111 | MZ490766     | MZ488549     | MZ488526     |
| 76 | <i>Pseudogymnoascus fujianensis</i>   | GZUIFR 21.820       | China                 | Soil                         | MZ444085      | MZ444112 | MZ490767     | MZ488550     | MZ488527     |
| 77 | <i>Pseudogymnoascus</i> sp.           | 19BE01LM3           | South Korea           | Bat habitat soil             | ON545818      | ON553446 | ON614743     | ON614763     | ON707013     |
| 78 | <i>Pseudogymnoascus</i> sp.           | 19BE02LM3           | South Korea           | Bat habitat soil             | ON545819      | ON553447 | ON614744     | ON614764     | ON707014     |
| 79 | <i>Pseudogymnoascus</i> sp.           | 19BE05LM1           | South Korea           | Bat habitat soil             | ON545820      | ON553448 | ON614745     | ON614765     | ON707015     |
| 80 | <i>Pseudogymnoascus</i> sp.           | 20BE01LM1           | South Korea           | Bat habitat soil             | ON545821      | ON553449 | ON614746     | ON614766     | ON707016     |

| No | Species                     | Strain <sup>a</sup> | Locality    | Substrate<br>/host | Accession No. |          |          |          |          |
|----|-----------------------------|---------------------|-------------|--------------------|---------------|----------|----------|----------|----------|
|    |                             |                     |             |                    | ITS           | LSU      | MCM7     | RPB2     | TEF1     |
| 81 | <i>Pseudogymnoascus</i> sp. | 20BE05LM1           | South Korea | Bat habitat soil   | ON545822      | ON553450 | ON614747 | ON614767 | ON707026 |
| 82 | <i>Pseudogymnoascus</i> sp. | 20BE06LM1           | South Korea | Bat habitat soil   | ON545823      | ON553451 | ON614748 | ON614768 | ON707017 |
| 83 | <i>Pseudogymnoascus</i> sp. | 20BE09LM2           | South Korea | Bat habitat soil   | ON545824      | ON553452 | ON614749 | ON614769 | ON707020 |
| 84 | <i>Pseudogymnoascus</i> sp. | 20BE10LM1           | South Korea | Bat habitat soil   | ON545825      | ON553453 | ON614750 | ON614770 | ON707021 |
| 85 | <i>Pseudogymnoascus</i> sp. | 20BE20LM3           | South Korea | Bat habitat soil   | ON545826      | ON553454 | ON614751 | ON614771 | ON707022 |
| 86 | <i>Pseudogymnoascus</i> sp. | 20BE25LM2           | South Korea | Bat habitat soil   | ON545827      | ON553455 | ON614752 | ON614772 | ON707023 |
| 87 | <i>Pseudogymnoascus</i> sp. | 20BE27LM1           | South Korea | Bat habitat soil   | ON545828      | ON553456 | ON614753 | ON614773 | ON707018 |
| 88 | <i>Pseudogymnoascus</i> sp. | 20BE35LM1           | South Korea | Bat habitat soil   | ON545829      | ON553457 | ON614754 | ON614774 | ON707019 |
| 89 | <i>Pseudogymnoascus</i> sp. | 20BE36LM4           | South Korea | Bat habitat soil   | ON545830      | ON553458 | ON614755 | ON614775 | ON707024 |
| 90 | <i>Pseudogymnoascus</i> sp. | 20BE38LM1           | South Korea | Bat habitat soil   | ON545831      | ON553459 | ON614756 | ON614776 | ON707025 |
| 91 | <i>Pseudogymnoascus</i> sp. | 19BG05LM3           | South Korea | Bat guano          | ON545832      | ON545849 | ON614757 | ON614777 | ON707007 |
| 92 | <i>Pseudogymnoascus</i> sp. | 19BG18LM2           | South Korea | Bat guano          | ON545833      | ON545850 | ON614758 | ON614778 | ON707008 |
| 93 | <i>Pseudogymnoascus</i> sp. | 20BOS05LM2          | South Korea | Bat oral swab      | ON545834      | ON553460 | ON614742 | ON614779 | ON707009 |
| 94 | <i>Pseudogymnoascus</i> sp. | 20BSS04LM4          | South Korea | Bat skin swab      | ON545837      | ON553461 | ON614759 | ON614780 | ON707010 |
| 95 | <i>Pseudogymnoascus</i> sp. | 20BSS17OM1          | South Korea | Bat skin swab      | ON545838      | ON553462 | ON614761 | ON614781 | ON707011 |
| 96 | <i>Pseudogymnoascus</i> sp. | 20BSS17OM2          | South Korea | Bat skin swab      | ON545839      | ON553463 | ON614762 | ON614782 | ON707012 |

<sup>a</sup> CBS: Culture collection of the Westerdijk Biodiversity Institute, Utrecht, the Netherlands; CGMCC: China General Microbiological Culture Collection Center, Beijing, China; GZUIFR: Herbarium of Guizhou Agricultural College, Institute of Fungus Resources, Guizhou University, China; CHFC: Chilean Fungal Collection, Facultad de Medicina, Universidad de Chile, Santiago, Chile; RMF : Rocky Mountain Fungi, IBT (Institut for Biotechnologi) Culture collection of Fungi, Lyngby, Denmark; WSF: Wisconsin Soil Fungi, IBT (Institut for Biotechnologi) Culture collection of Fungi, Lyngby, Denmark. UAMH: University of Alberta Microfungus Collection and Herbarium (UAMH) Centre for Global Microfungal Biodiversity, University of Toronto, Canada; VKM: All-Russian Collection of Microorganisms, Skryabin Institute of Biochemistry and Physiology of Microorganisms, Russian Academy of Science, Pushchino, Russia.

<sup>b</sup> na = not available. <sup>c</sup> Some markers were extracted from sequenced genomes. In these cases, the GenBank accession number of the contig is given. Numbers in parentheses indicate the location of the sequence of interest in the contig (from nucleotide XX to XX).

## References

1. White, T.; Bruns, T.; Lee, S.; Taylor, J.; Innis, M.; Gelfand, D.; Sninsky, J. Amplification and Direct Sequencing of Fungal Ribosomal RNA Genes for Phylogenetics. 1990; Volume 31, pp. 315-322.
2. Al-Shuhaib, M.B.S.; Al-Kaaby, H.N.; Alwan, S.L. A highly efficient electrophoretic method for discrimination between two *Neoscytalidium* species using a specific fungal internal transcribed spacer (ITS) fragment. *Folia Microbiologica* **2019**, *64*, 161-170, doi:10.1007/s12223-018-0641-0.
3. Moncalvo, J.M.; Lutzoni, F.M.; Rehner, S.A.; Johnson, J.; Vilgalys, R. Phylogenetic Relationships of Agaric Fungi Based on Nuclear Large Subunit Ribosomal DNA Sequences. *Systematic Biology* **2000**, *49*, 278-305, doi:10.1093/sysbio/49.2.278.
4. Vilgalys, R.; Hester, M. Rapid genetic identification and mapping of enzymatically amplified ribosomal DNA from several *Cryptococcus* species. *Journal of Bacteriology* **1990**, *172*, 4238-4246, doi:doi:10.1128/jb.172.8.4238-4246.1990.
5. Zhang, F.; Li, L.; Sun, M.; Hu, C.; Zhang, Z.; Liu, Z.; Shao, H.; Xi, G.; Pan, J. Fungal Community Analyses of a Pirogue from the Tang Dynasty in the National Maritime Museum of China. *Applied Sciences* **2019**, *9*, 4129.
6. Rehner, S.A.; Buckley, E. A *Beauveria* phylogeny inferred from nuclear ITS and EF1- $\alpha$  sequences: evidence for cryptic diversification and links to *Cordyceps* teleomorphs. *Mycologia* **2005**, *97*, 84-98, doi:10.1080/15572536.2006.11832842.
7. Schmitt, I.; Crespo, A.; Divakar, P.K.; Fankhauser, J.D.; Herman-Sackett, E.; Kalb, K.; Nelsen, M.P.; Nelson, N.A.; Rivas-Plata, E.; Shimp, A.D.; et al. New primers for promising single-copy genes in fungal phylogenetics and systematics. *Persoonia - Molecular Phylogeny and Evolution of Fungi* **2009**, *23*, 35-40, doi:10.3767/003158509X470602.
8. Raja, H.A.; Schoch, C.L.; Hustad, V.; Shearer, C.; Miller, A. Testing the phylogenetic utility of MCM7 in the Ascomycota. *MycoKeys* **2011**, *1*, doi:10.3897/mycokeys.1.1966.
9. Liu, Y.J.; Whelen, S.; Hall, B.D. Phylogenetic relationships among ascomycetes: evidence from an RNA polymerase II subunit. *Molecular Biology and Evolution* **1999**, *16*, 1799-1808, doi:10.1093/oxfordjournals.molbev.a026092.
10. Reeb, V.; Lutzoni, F.; Roux, C. Contribution of RPB2 to multilocus phylogenetic studies of the euascomycetes (Pezizomycotina, Fungi) with special emphasis on the lichen-forming Acarosporaceae and evolution of polyspory. *Molecular Phylogenetics and Evolution* **2004**, *32*, 1036-1060, doi:10.1016/j.ympev.2004.04.012.
11. Lorch, J.M.; Gargas, A.; Meteyer, C.U.; Berlowski-Zier, B.M.; Green, D.E.; Shearn-Bochsler, V.; Thomas, N.J.; Blehert, D.S. Rapid Polymerase Chain Reaction Diagnosis of White-Nose Syndrome in Bats. *Journal of Veterinary Diagnostic Investigation* **2010**, *22*, 224-230, doi:10.1177/104063871002200208.
12. Minnis, A.M.; Lindner, D.L. Phylogenetic evaluation of *Geomyces* and allies reveals no close relatives of *Pseudogymnoascus destructans*, comb. nov., in bat hibernacula of eastern North America. *Fungal Biology* **2013**, *117*, 638-649, doi:10.1016/j.funbio.2013.07.001.
13. Villanueva, P.; Vásquez, G.; Gil-Durán, C.; Oliva, V.; Díaz, A.; Henríquez, M.; Álvarez, E.; Laich, F.; Chávez, R.; Vaca, I. Description of the First Four Species of the Genus *Pseudogymnoascus* From Antarctica. *Front Microbiol* **2021**, *12*, 713189, doi:10.3389/fmicb.2021.713189.
14. Zhang, Z.; Dong, C.; Chen, W.; Mou, Q.; Lu, X.; Han, Y.; Huang, J.; Liang, Z. The Enigmatic Thelebolaceae (Thelebolales, Leotiomyces): One New Genus *Solomyces* and Five New Species. *Front Microbiol* **2020**, *11*, 572596, doi:10.3389/fmicb.2020.572596.
15. Zhang, Z.Y.; Shao, Q.Y.; Li, X.; Chen, W.H.; Liang, J.D.; Han, Y.F.; Huang, J.Z.; Liang, Z.Q. Culturable Fungi from Urban Soils in China I: Description of 10 New Taxa. *Microbiology Spectrum* **2021**, *9*, e00867-00821, doi:10.1128/Spectrum.00867-21.
